# Supplementary material
Source: publisher site journal article supplement (https://www.degruyterbrill.com/publication/isbn/9783866538832/downloadAsset/9783866538832_Inhaltsverzeichnis.pdf)
Supplement: Supplementary file 1 [file 9783866538832_Inhaltsverzeichnis.pdf]

# **Europäisches Zivilprozess- und Kollisionsrecht**

## **EuZPR / EuIPR**

Kommentar

**Bearbeitung 2010**

Brüssel IIa-VO • EG-UntVO

EG-ErbVO-E • HUntStProt 2007

## Das Gesamtwerk EuZPR / EulPR mit den Bänden

- Brüssel I-VO, LugÜbk 2007
- EG-VollstrTitelVO, EG-MahnVO, EG-BagatellVO, EG-ZustVO, EG-BewVO, EG-InsVO
- Rom I-VO, Rom II-VO
- Brüssel IIa-VO, EG-UntVO, EG-ErbVO-E, HUntStProt 2007

wird herausgegeben von Professor **Dr. Thomas Rauscher**, Leipzig

# **Europäisches Zivilprozess- und Kollisionsrecht EuZPR / EuIPR**

## **Kommentar**

**Bearbeitung 2010**

Brüssel IIa-VO • EG-UntVO

EG-ErbVO-E • HUntStProt 2007

Herausgegeben von

**Thomas Rauscher**

Kommentiert von

**Marianne Andrae • Thomas Rauscher • Martin Schimrick**

  
sellier.  
european law  
publishers

## Kommentatoren/in

### Bearbeitung 2010

|                 |                         |
|-----------------|-------------------------|
| Brüssel IIa-VO  | <i>Thomas Rauscher</i>  |
| EG-UntVO        | <i>Marianne Andrae</i>  |
|                 | <i>Martin Schimrick</i> |
| EG-ErbVO-E      | <i>Thomas Rauscher</i>  |
| HUntStProt 2007 | <i>Marianne Andrae</i>  |

### 2. Auflage 2006

|                |                        |
|----------------|------------------------|
| Brüssel IIa-VO | <i>Thomas Rauscher</i> |
| EG-UntVO-E     | <i>Thomas Rauscher</i> |

### 1. Auflage 2004

|               |                        |
|---------------|------------------------|
| Brüssel II-VO | <i>Thomas Rauscher</i> |
|---------------|------------------------|

## Zitierweise

Rauscher/*Rauscher*, EuZPR/EuIPR (2010)  
Einl Brüssel IIa-VO Rn 1  
Rauscher/*Rauscher*, EuZPR/EuIPR (2010)  
Art 1 Brüssel IIa-VO Rn 1  
Rauscher/*Andrae*, EuZPR/EuIPR (2010)  
Vorbem Artt 3 ff EG-UntVO Rn 1  
Rauscher/*Andrae/Schimrick*, EuZPR/EuIPR  
(2010) Art 16 EG-UntVO Rn 1  
Rauscher/*Rauscher*, EuZPR/EuIPR (2010)  
Einf EG-ErbVO-E Rn 1

## Abkürzungsempfehlungen

|                   |                 |
|-------------------|-----------------|
| Brüssel I-VO      | EG-InsVO        |
| LugÜbk 2007       | Rom I-VO        |
| EG-VollstrTitelVO | Rom II-VO       |
| EG-MahnVO         | Brüssel IIa-VO  |
| EG-BagatellVO     | EG-UntVO        |
| EG-ZustVO 2007    | EG-ErbVO-E      |
| EG-BewVO          | HUntStProt 2007 |

ISBN (print) 978-3-86653-089-8  
ISBN (eBook) 978-3-86653-883-2

Die Deutsche Nationalbibliothek verzeichnet diese Publikation in der Deutschen Nationalbibliografie; detaillierte bibliografische Daten sind im Internet über <http://dnb.d-nb.de> abrufbar.

© 2010 by sellier. european law publishers GmbH, München.

Dieses Werk einschließlich aller seiner Teile ist urheberrechtlich geschützt. Jede Verwertung außerhalb der engen Grenzen des Urheberrechtsgesetzes ist ohne Zustimmung des Verlages unzulässig und strafbar. Das gilt insbesondere für Vervielfältigungen, Übersetzungen, Mikroverfilmungen und die Einspeicherung und Verarbeitung in elektronischen Systemen.

Gestaltung: Sandra Sellier, München. Herstellung: Karina Hack, München. Satz: fidus Publikations-Service, Nördlingen. Verwendete Schriften: Goudy Old Style und Goudy Sans von Linotype. Druck und Bindung: Friedrich Pustet KG, Regensburg. Gedruckt auf säurefreiem, alterungsbeständigem Papier. Printed in Germany.

# Systematik des Gesamtkommentars

(Stand Januar 2010)

## **A Allgemeines Zivil- und Handelsrecht**

**A.I Zuständigkeit, Anerkennung, Vollstreckung**  
Brüssel I-VO, LugÜbk 2007; EG-VollstrTitelVO;  
EG-MahnVO, EG-BagatellVO

**A.II Rechtshilfe**  
EG-ZustVO 2007, EG-BewVO

**A.III Insolvenz**  
EG-InsVO

**A.IV Kollisionsrecht**  
Rom I-VO, Rom II-VO

## **B Familien- und Erbrecht**

**B.I Zuständigkeit, Anerkennung, Vollstreckung**  
Brüssel IIa-VO, EG-UntVO, EG-ErbVO-E

**B.IV Kollisionsrecht**  
HUntStProt 2007

## Kommentatoren/innen

**Dr. Marianne Andrae**

Professorin an der Universität Potsdam

**Dr. Johannes Cziupka**

Wiss. Mitarbeiter an der Universität  
Bayreuth

**Dr. Robert Freitag Maître en droit**  
(Bordeaux)

Professor an der Universität Hamburg

**Dr. Martin Fricke**

Stv. Leiter Recht beim Gesamtverband  
der Deutschen Versicherungswirtschaft

**Dr. Urs Peter Gruber**

Professor an der Universität Mainz

**Dr. Bettina Heiderhoff**

Professorin an der Universität Hamburg

**Dr. Jan von Hein**

Professor an der Universität Trier

**Dr. Dominique Jakob M.I.L. (Lund)**

Professor an der Universität Zürich

**Dr. Stefan Leible**

Professor an der Universität Bayreuth

**Dr. Peter Mankowski**

Professor and der Universität Hamburg

**Dr. Gerald Mäsch**

Professor an der Universität Münster  
Richter am Oberlandesgericht Hamm

**Dr. Steffen Pabst LL.M. (Stockholm)**

Akademischer Rat an der Universität  
Leipzig

**Peter Picht**

Wiss. Mitarbeiter an der  
Universität Zürich

**Dr. Thomas Rauscher**

Professor an der Universität Leipzig  
Dipl. math.

**Martin Schimrick**

Wiss. Mitarbeiter an der  
Universität Potsdam

**Dr. Ansgar Staudinger**

Professor an der Universität Bielefeld

**Dr. Karsten Thorn LL.M.**

(Georgetown)

Professor an der Bucerius Law School  
Hamburg

**Dr. Hannes Unberath M.Jur. (Oxford)**

Professor an der Universität Bayreuth

**Dr. István Varga**

Professor an der ELTE Universität  
Budapest  
Rechtsanwalt in Budapest  
Dipl. phil.

# Inhaltsverzeichnis

Abkürzungsverzeichnis IX

Kommentarliteratur XXVII

## B Familien- und Erbrecht

### B.I Zuständigkeit, Anerkennung, Vollstreckung

#### B.I.1 Brüssel IIa-VO

Verordnung (EG) Nr 2201/2003 des Rates vom 27.11.2003 über die Zuständigkeit und die Anerkennung und Vollstreckung von Entscheidungen in Ehesachen und in Verfahren betreffend die elterliche Verantwortung und zur Aufhebung der Verordnung (EG) Nr 1347/2000

Kommentiert von: Thomas Rauscher 3

#### B.I.2 EGUnt-VO

Verordnung (EG) Nr 4/2009 des Rates vom 18.12.2008 über die Zuständigkeit, das anwendbare Recht, die Anerkennung und Vollstreckung von Entscheidungen und die Zusammenarbeit in Unterhaltssachen

Kommentiert von: Marianne Andrae  
Martin Schimrick 429

#### B.I.5 EG-ErbVO-E

Vorschlag vom 14.10.2009 für eine Verordnung des Europäischen Parlaments und des Rates über die Zuständigkeit, das anzuwendende Recht, die Anerkennung und die Vollstreckung von Entscheidungen und öffentlichen Urkunden in Erbsachen sowie zur Einführung eines Europäischen Nachlasszeugnisses (KOM [2009] 154)

Kommentiert von: Thomas Rauscher 813

**B.IV Kollisionsrecht**

**B.IV.1 HUnStProt 2007**

Haager Protokoll über das auf Unterhaltspflichten anzuwendende  
Recht vom 23.11.2007

Kommentiert von: Marianne Andrae 869

Gesetzesanhang 985

Register 1005
